# Supplementary material for: The effect of satellite-derived surface soil moisture and leaf area index land data assimilation on streamflow simulations over France
Source: Copernicus journal article supplement (doi:10.5194/hess-21-2015-2017), 2017-04-13
Supplement: Supplementary file 1 [file hess-21-2015-2017-supplement.pdf]

Supplement of Hydrol. Earth Syst. Sci., 21, 2015–2033, 2017  
<http://www.hydrol-earth-syst-sci.net/21/2015/2017/>  
doi:10.5194/hess-21-2015-2017-supplement  
© Author(s) 2017. CC Attribution 3.0 License.

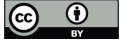

Hydrology and  
Earth System  
Sciences

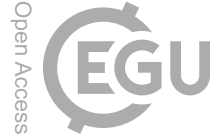

*Supplement of*

## **The effect of satellite-derived surface soil moisture and leaf area index land data assimilation on streamflow simulations over France**

**David Fairbairn et al.**

*Correspondence to:* Jean-Christophe Calvet ([jean-christophe.calvet@meteo.fr](mailto:jean-christophe.calvet@meteo.fr))

The copyright of individual parts of the supplement might differ from the CC-BY 3.0 licence.

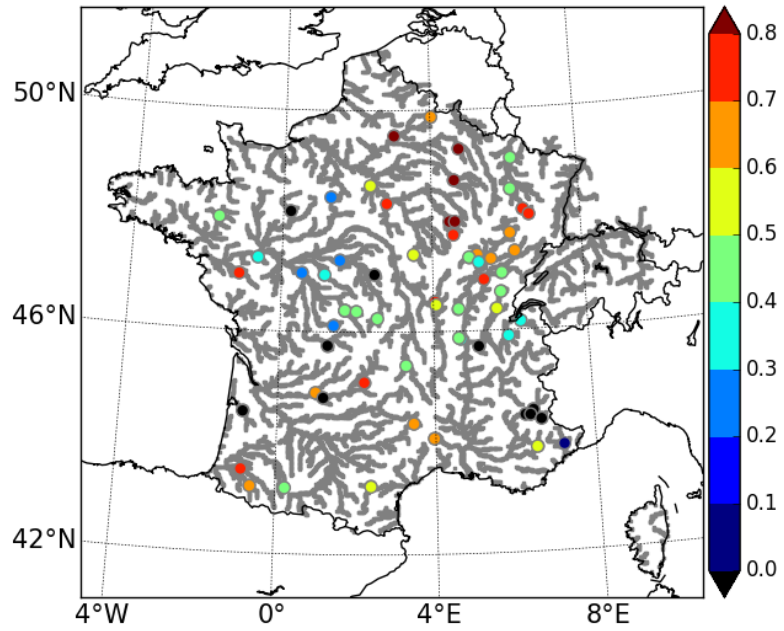

Figure S1: Map of the SIM discharge Nash efficiency scores for the 67 stations with low-anthropogenic influence over France for the NIT simulation, calculated over the period 2007-2014. The river network is also shown.

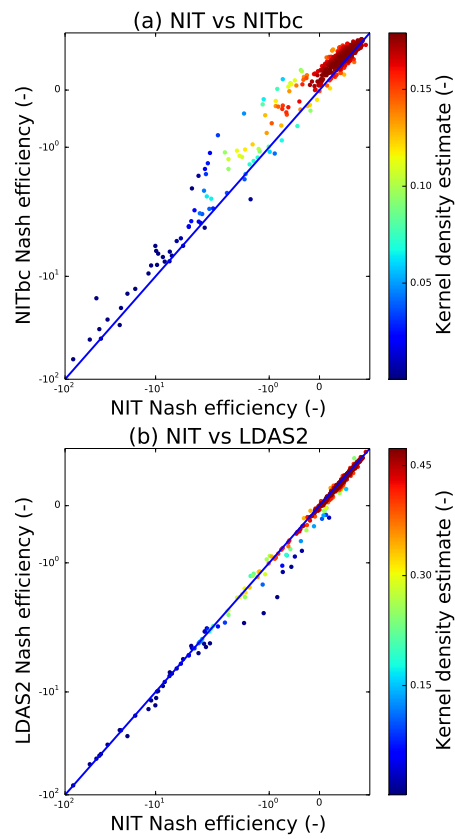

Figure S2: Scatter plots of the SIM discharge Nash efficiency scores for all 546 stations for (a) NIT vs NITbc and (b) for NIT vs LDAS2. The scores are calculated over 2007-2014.

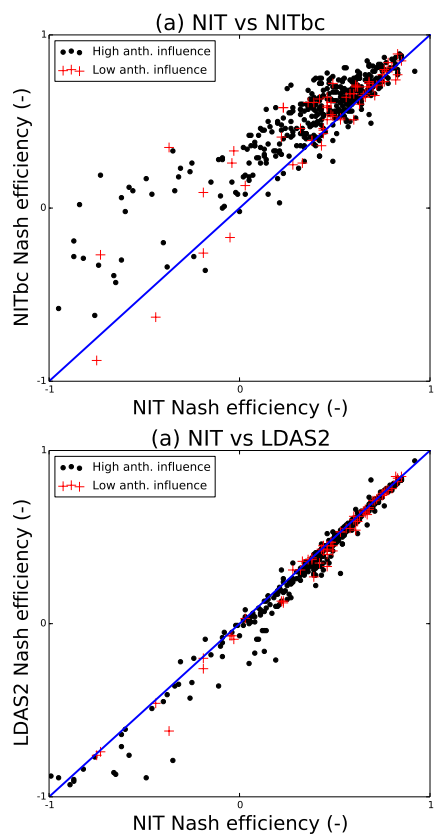

Figure S3: Same as Fig. S2, but the stations are classified with either low (67 stations) or high anthropogenic influence (479 stations). For the sake of clarity, the Nash scores are shown between -1.0 and 1.0.

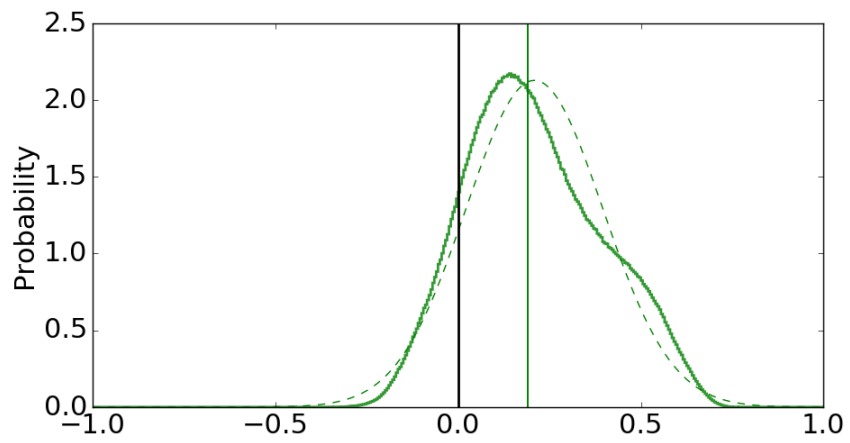

Figure S4: Innovation (thick line) histogram and its Gaussian fit (dashed line) for the SSM product without seasonal CDF matching.

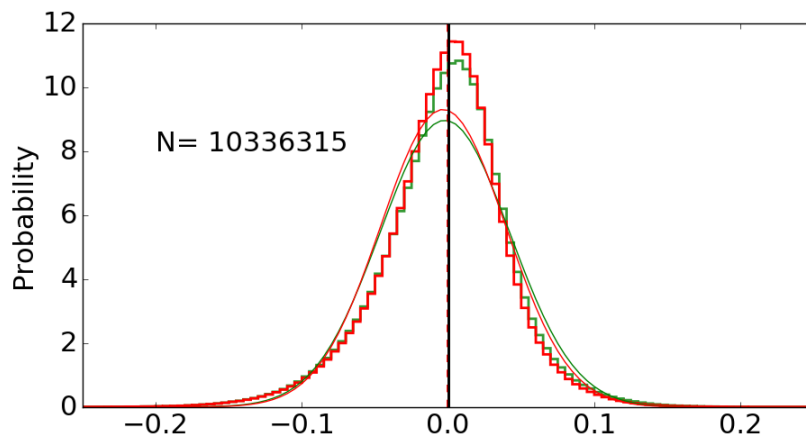

Figure S5: Innovation (green thick line) and residual (red thick line) histograms, as well as their Gaussian fits respectively, for the SSM product with seasonal CDF matching.

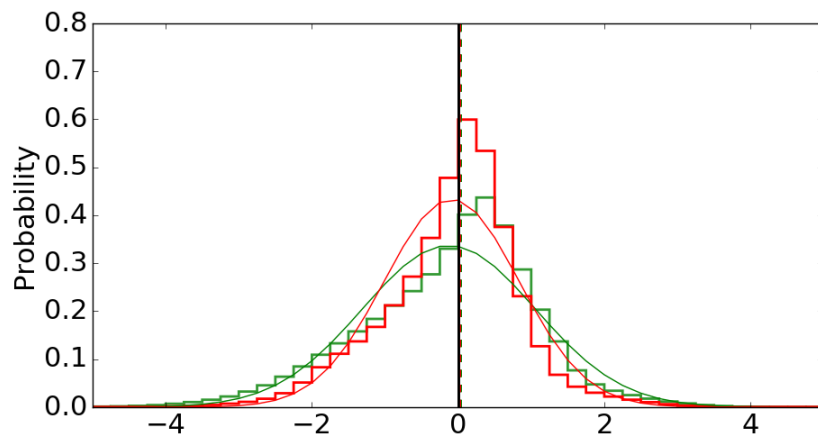

Figure S6: Innovation (green thick line) and residual (red thick line) histograms, as well as their Gaussian fits respectively for LAI product.

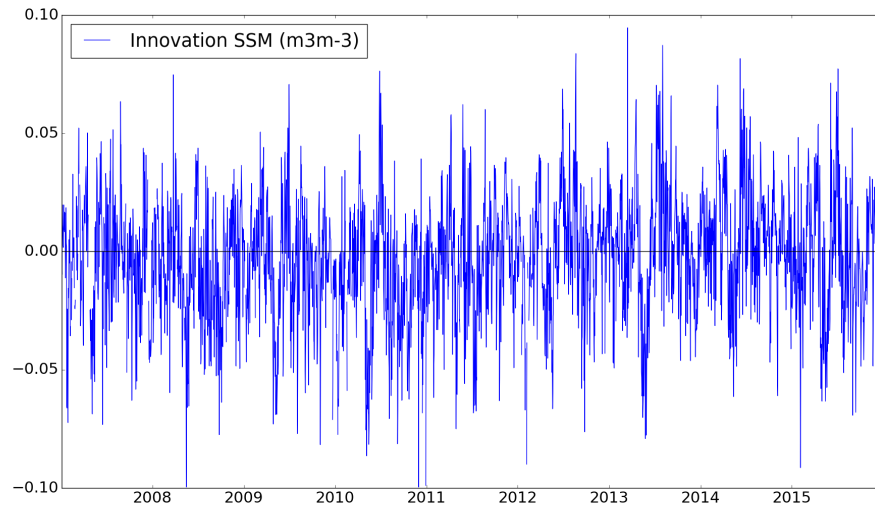

Figure S7: Temporal evolution of SSM innovations.

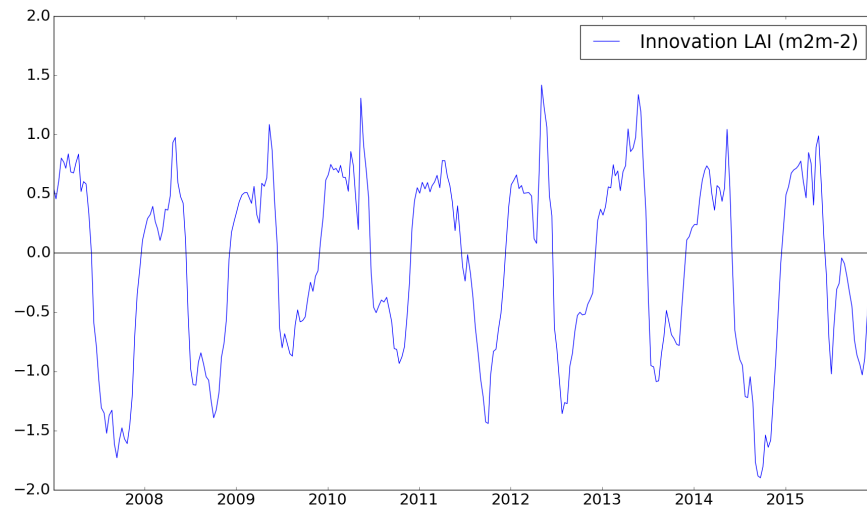

Figure S8: Temporal evolution of LAI innovations.
